# Supplementary material
Source: MDPI journal article supplement (https://www.mdpi.com/2220-9964/4/3/1672)
Supplement: s1 [file s1]

## Sheet: Metadata
Dimension and indicator			Unit	Year	Data source
Comprehensive National Power
	Critical Mass (CM)
		Population	number	2013	WDI
		Land area	sq. km	2013	WDI
		energy production	kg of oil equivalent	2011	WDI
		Total natural resource rents	US$	2013	WDI
	Economic Strength (E)
		GDP total (USD)	US$	2014	WDI
	Technological Strength (T)
		Research and development expenditure	US$	2002-2012	WDI
		Researchers in R&D (per million people)	number	2002-2012	WDI
		Scientific and technical journal articles	number	2011	WDI
		patent applications (residents and nonresidents)	number	2010-2012	WDI
	Military Strength (M)
		Military expenditure	current US$ m.	2012-2013	SIPRI
		Armed forces personnel, total	number	2013	WDI
		Arms imports and exports	SIPRI trend indicator values	total, 2005-2014	WDI
		Total nuclear warhead inventory	number	2014	SIPRI
	Cultural Appeal (CA)
		Total number of national feature films produced	number	2009-2011	UNESCO UIS
		total Olympic medals in history	number	~2012	games-encyclo.org
		Number of World Heritage natural and cultural sites	number	2012	WEF T&T Report
		Number of international fairs and exhibitions	number	2012	WEF T&T Report
		Total inbound internationally mobile students	number	2008-2012	UNESCO UIS
Social-adjusted Index
	Healthy and decent life
		Life expectancy at birth	years	2013	WDI
		GNI per capita	PPP (constant 2011 international $)	2013	WDI
		Access to improved sanitation facilities	% of population	2012	WDI
	Education
		Mean years of schooling	years	2012	HDI
		Expected years of schooling	years, of children	2014	HDI
		Literacy rate	youth (% aged 15-24)	2005-2012	HDI
		School enrollment	tertiary (% gross)	2011-2014	WDI
		Expenditure on education	% of GDP	2005-2012	WDI
	Well-balanced society
		Worldwide Governance Indicators	composite index	2013	WGI
		Gender inequality index	composite index	2013	HDI
		Poverty headcount ratio at $2 a day	(PPP) (% of population)	2009-2012	WDI
		Unemployment	(% of total labor force) (modeled ILO estimate)	2013	WDI
		Population growth	annual %	2014	WDI
		Population ages 65 and above	% of total	2014	WDI
Environmental-adjusted Index
	Renewable resources
		Renewable energy consumption	% of total final energy consumption	2011	WDI
		Renewable internal freshwater resources	per captia, cubic meters	2013	WDI
		Primary energy supply from renewable sources	% of total	2012	HDI
	Natural resources and biodiversity
		Forest area	% of land area	2012	WDI
		GEF benefits index for biodiversity	0 = no biodiversity potential to 100 = maximum	2008	WDI
		Adjusted savings: natural resources depletion	% of GNI	2009-2013	WDI
	Carbon reduction
		CO2 emissions	metric tons per capita	2011	WDI
	Abbreviations and websites of data source:
		WDI: world development indicators by World Bank (http://data.worldbank.org/)
		SIPRI: Stockholm International Peace Research Institute Military Expenditure Database and Yearbook 2014 (http://www.sipri.org/)
		WGI: Worldwide governance indicators (www.govindicators.org)
		WEF T&T Report: World Economic Forum Travel & Tourism Competitiveness Report 2013 (http://www.weforum.org/reports/)
		UNESCO UIS: UNESCO Institute for Statistics (http://data.uis.unesco.org/)
		HDI: Human development index (http://hdr.undp.org/en/content/human-development-index-hdi)

## Sheet: CNP(2014)
Comprehensive National Power		Critical Mass				Economic Strength	Technological Strength				Military Strength				Cultural Appeal
CODE	Country	Population	Land area	energy production	Total natural resource rents	GDP total (USD)	Research and development expenditure	Researchers in R&D (per million people)	Scientific and technical journal articles	patent applications (residents and nonresidents)	Military expenditure	Armed forces personnel, total	Arms imports and exports	Total nuclear warhead inventory	Total number of national feature films produced	total Olympic medals in history	Number of World Heritage natural and cultural sites	Number of international fairs and exhibitions	Total inbound internationally mobile students
Original Data		number	sq. km	kg of oil equivalent	US$	US$	US$	number	number	number	current US$ m.	number	SIPRI trend indicator values	number	number	number	number	number	number
		2013	2013	2011	2013	2014	2002-2012	2002-2012	2011	2010-2012	2012-2013	2013	total, 2005-2014	2014	2009-2011	~2012	2012	2012	2008-2012
RUS	Russian Federation	143499861	16376870	1.31488e+06	3.74179e+11	1860600000000	2.25557e+10	3096.11	14150.9	44211	87837	1364000	65243000000	8000	140	529	27	62.67	173627
KOR	Korea, Rep.	50219669	97350	46988.3	4.94196e+08	1410380000000	4.93915e+10	5928.28	25592.7	188915	33937	659500	13417000000	0	216	296	24	204.33	59472
PRK	Korea, Dem. Rep.	24895480	120410	25194.4					4.4	8381		1379000	136000000	7		49	0	0
VNM	Vietnam	89708900	310070	66595.5	1.65766e+10	186205000000	2.77484e+08	113.001	431.5	3805	3387	522000	4045000000	0	75	2	13	35	3996
LAO	Lao PDR	6769727	230800		1.73332e+09	11771725798	3.48254e+06	15.6891	21.4		20	129100	89000000	0	2	0	0	0	588
MMR	Myanmar	53259018	653290	22394.2		64330038665		16.991	9.1			513250	2223000000	0	27	0	0	0	65
NPL	Nepal	27797457	143350	9038.53	9.3437e+08	19636186469	5.8043e+07	62.2333	63.5		258	157750	28000000	0		0	4	5	107
IND	India	1252139596	2973190	540939	89695138026	2066900000000	1.49819e+10	159.933	22480.5	43955	47398	2728700	30003000000	100	1255	26	37	111.67	31475
PAK	Pakistan	182142594	770880	65066.6	8.97372e+09	246876000000	7.39901e+08	148.854	1267.9	894	7641	947800	9847000000	110	27	10	7	3
AFG	Afghanistan	30551674	652860		2.47587e+08	20841951232			7.7		1293	338150	2685000000	0		2	0	0
TJK	Tajikistan	8207834	139960	1541.63	1.44337e+08	9241627841	9.27263e+06		18.4	6		16300	55000000	0	8	3	2	0.67	3107
KGZ	Kyrgyz Republic	5719500	191800	1619.49	7.20698e+08	7404412710	1.03258e+07		17.2	111	234	20400	55000000	0	1	3	3	0	16425
KAZ	Kazakhstan	17037508	2699700	160148	6.8951e+10	212248000000	3.1999e+08	651.82	87.4	1732	2799	70500	680000000	0	12	59	3	5.33	8982
JPN	Japan	127338621	364560	51670.4	1.73228e+09	4601460000000	2.01176e+11	5157.52	47105.7	342796	48604	259800	4466000000	0	441	443	36	290.33	150617
PHL	Philippines	98393574	298170	23887.9	8.6289e+09	284582000000	2.74275e+08	78.278	241.3	2994	3472	165500	282000000	0	78	9	7	38.33	2665
MYS	Malaysia	29716965	328550	84266.5	3.39718e+10	326933000000	3.24948e+09	1642.69	2092.2	6940	4842	133600	3618000000	0	49	6	5	124.67	63625
BRN	Brunei Darussalam	417784	5270	18694.6	5.65738e+09	17256754269	6.27466e+06	282.43	14.6	42	412	9250	503000000	0		0	0	4.67	354
IDN	Indonesia	249865631	1811570	394573	6.01355e+10	888538000000	7.30483e+08	89.8955	269.9	5838	7840	676500	4091000000	0	84	27	14	58.33	7235
MNG	Mongolia	2839073	1553560	19309.9	3.51469e+09	12015944337	2.82739e+07		24.8	179	115	17200	104000000	0	13	24	12	3.33	1058
CHN	China	1357380000	9388211	2.4325e+06	435157961182	10360100000000	1.63195e+11	1019.57	89894.4	652777	188460	2993000	28869000000	250	584	526	83	316.67	88979
BTN	Bhutan	753947	38117		3.15299e+08	1821412873			8.3			0	0	0	29	0	0	0
Normalized to 0-	100	using	100	*(country value - min)/(max-min)
RUS	Russian Federation	10.5443	100	54.0252	85.9824	17.9449	11.2104	52.0993	15.7376	6.7719	46.6021	45.573	100	100	11.0845	100	32.5301	19.7903	100
KOR	Korea, Rep.	3.6701	0.562437	1.86949	0.0804247	13.5984	24.5501	100	28.4662	28.9396	17.9988	22.0347	20.5647	0	17.1451	55.9546	28.9157	64.5246	34.2281
PRK	Korea, Dem. Rep.	1.80386	0.703291	0.972981					0	1.28299		46.0742	0.208451	0.0875		9.26276	0	0
VNM	Vietnam	6.58022	1.86176	2.67605	3.77742	1.78006	0.136203	1.64585	0.475136	0.581981	1.78678	17.4407	6.1999	0	5.90112	0.378072	15.6627	11.0525	2.2649
LAO	Lao PDR	0.4681	1.37757		0.365271	0.0960615	0	0	0.018912		0	4.3134	0.136413	0	0.0797448	0	0	0	0.301333
MMR	Myanmar	3.89408	3.9582	0.857791		0.603465		0.0220191	0.00522861			17.1483	3.40726	0	2.07337	0	0	0	0
NPL	Nepal	2.01772	0.843412	0.308392	0.181611	0.171986	0.0271212	0.787203	0.065747		0.1263	5.27063	0.0429165	0		0	4.81928	1.57893	0.0241988
IND	India	92.2444	18.1285	22.1886	20.5857	19.9365	7.44555	2.4396	25.004	6.73268	25.1422	91.1694	45.9865	1.25	100	4.91493	44.5783	35.2638	18.0973
PAK	Pakistan	13.392	4.67645	2.61316	2.02968	2.36578	0.366064	2.25222	1.40561	0.136035	4.04426	31.6672	15.0928	1.375	2.07337	1.89036	8.43373	0.947358
AFG	Afghanistan	2.22069	3.95557		0.0237348	0.183626			0.00367115		0.675547	11.298	4.11538	0		0.378072	0	0
TJK	Tajikistan	0.57408	0.822705	0	0	0.0716356	0.00287817		0.0155746	0		0.544604	0.0843002	0	0.558214	0.567108	2.40964	0.211577	1.75269
KGZ	Kyrgyz Republic	0.390705	1.13935	0.00320293	0.132493	0.0538989	0.00340169		0.0142396	0.0160853	0.113564	0.68159	0.0843002	0	0	0.567108	3.61446	0	9.42603
KAZ	Kazakhstan	1.22477	16.458	6.52441	15.8171	2.03148	0.157332	10.7589	0.0923351	0.264411	1.47474	2.3555	1.04226	0	0.877193	11.1531	3.61446	1.68314	5.13765
JPN	Japan	9.35331	2.19459	2.06209	0.365032	44.4054	100	86.964	52.3988	52.5131	25.7822	8.68025	6.84518	0	35.0877	83.7429	43.3735	91.6822	86.7425
PHL	Philippines	7.22023	1.78907	0.919237	1.95041	2.7298	0.134607	1.05857	0.263544	0.457741	1.83188	5.52957	0.43223	0	6.14035	1.70132	8.43373	12.1041	1.49802
MYS	Malaysia	2.15917	1.97464	3.40297	7.77618	3.13866	1.61354	27.5176	2.32262	1.06224	2.5589	4.46375	5.54542	0	3.82775	1.13422	6.0241	39.3691	36.6209
BRN	Brunei Darussalam	0	0	0.705604	1.26733	0.149015	0.00138792	4.51141	0.0113472	0.00551495	0.208024	0.309054	0.770964	0		0	0	1.47472	0.166511
IDN	Indonesia	18.3828	11.0331	16.1677	13.7906	8.56046	0.361382	1.25506	0.295361	0.893422	4.14986	22.6027	6.2704	0	6.61882	5.10397	16.8675	18.4198	4.13109
MNG	Mongolia	0.178435	9.45717	0.730916	0.77477	0.0984192	0.0123235		0.0226944	0.0265024	0.0504139	0.574674	0.159404	0	0.956938	4.53686	14.4578	1.05157	0.57213
CHN	China	100	57.3123	100	100	100	81.1203	16.9787	100	100	100	100	44.2484	3.125	46.4912	99.4329	100	100	51.229
BTN	Bhutan	0.0247732	0.200634		0.0393003	0			0.00433864			0	0	0	2.23285	0	0	0
Scores & ranks of five dimensions		Critical Mass		Economic Strength		Technological Strength		Military Strength		Cultural Appeal
		score	rank	score	rank	score	rank	score	rank	score	rank
RUS	Russian Federation	62.638	2	17.9449	4	21.4548	4	73.0438	1	52.681	3
KOR	Korea, Rep.	1.54561	14	13.5984	5	45.489	3	15.1496	5	40.1536	5
PRK	Korea, Dem. Rep.	1.16004	15		20	0.641496	12	15.4567	4	3.08759	13
VNM	Vietnam	3.72386	8	1.78006	11	0.709791	10	6.35684	10	7.05185	8
LAO	Lao PDR	0.73698	17	0.0960615	17	0.006304	18	1.11245	16	0.0762156	21
MMR	Myanmar	2.90336	11	0.603465	12	0.0136239	16	6.85187	9	0.414673	18
NPL	Nepal	0.837783	16	0.171986	14	0.293357	14	1.35996	14	1.6056	15
IND	India	38.2868	3	19.9365	3	10.4055	5	40.887	3	40.5709	4
PAK	Pakistan	5.67783	6	2.36578	9	1.03998	9	13.0448	6	3.3362	12
AFG	Afghanistan	2.06666	13	0.183626	13	0.00367115	21	4.02224	11	0.126024	20
TJK	Tajikistan	0.349196	20	0.0716356	18	0.00615092	19	0.209635	19	1.09984	16
KGZ	Kyrgyz Republic	0.416438	19	0.0538989	19	0.0112422	17	0.219864	18	2.72152	14
KAZ	Kazakhstan	10.0061	5	2.03148	10	2.81825	7	1.21812	15	4.49311	10
JPN	Japan	3.49376	9	44.4054	2	72.969	2	10.3269	7	68.1258	2
PHL	Philippines	2.96974	10	2.7298	8	0.478615	13	1.94842	13	5.9755	9
MYS	Malaysia	3.82824	7	3.13866	7	8.12899	6	3.14202	12	17.3952	6
BRN	Brunei Darussalam	0.493232	18	0.149015	15	1.13241	8	0.322011	17	0.410308	19
IDN	Indonesia	14.8436	4	8.56046	6	0.701305	11	8.25575	8	10.2282	7
MNG	Mongolia	2.78532	12	0.0984192	16	0.0205068	15	0.196123	20	4.31507	11
CHN	China	89.3281	1	100	1	74.5247	1	61.8434	2	79.4306	1
BTN	Bhutan	0.0882358	21	0	20	0.00433864	20	0	21	0.558214	17
Scores and rnks of CNP		CNP
		score	rank
RUS	Russian Federation	45.5525	2
KOR	Korea, Rep.	23.1872	5
PRK	Korea, Dem. Rep.	5.08646	9
VNM	Vietnam	3.92448	11
LAO	Lao PDR	0.405603	19
MMR	Myanmar	2.1574	13
NPL	Nepal	0.853738	16
IND	India	30.0173	4
PAK	Pakistan	5.09292	8
AFG	Afghanistan	1.28045	15
TJK	Tajikistan	0.347293	20
KGZ	Kyrgyz Republic	0.684592	17
KAZ	Kazakhstan	4.11341	10
JPN	Japan	39.8642	3
PHL	Philippines	2.82042	12
MYS	Malaysia	7.12662	7
BRN	Brunei Darussalam	0.501396	18
IDN	Indonesia	8.51787	6
MNG	Mongolia	1.48309	14
CHN	China	81.0254	1
BTN	Bhutan	0.130158	21

## Sheet: SNP(2014)
Sustainable National Power		Healthy and Decent Life			Education					Well-balanced Society						Renewable Resources			Natural Resources and Biodiversity			Carbon Reduction
CODE	Country	Life expectancy at birth	GNI per capita	Access to improved sanitation facilities	Mean years of schooling	Expected years of schooling	Literacy rate	School enrollment	Expenditure on education	Worldwide Governance Indicators	Gender inequality index	Poverty headcount ratio at $2 a day	Unemployment	Population growth	Population ages 65 and above	Renewable energy consumption	Renewable internal freshwater resources	Primary energy supply from renewable sources	Forest area	GEF benefits index for biodiversity	Adjusted savings: natural resources depletion	CO2 emissions
Red: negative indicator		years	PPP (constant 2011 international $)	% of population	years	years, of children	youth (% aged 15-24)	tertiary (% gross)	% of GDP	composite index	composite index	(PPP) (% of population)	(% of total labor force) (modeled ILO estimate)	annual %	% of total	% of total final energy consumption	per captia, cubic meters	% of total	% of land area	0 = no biodiversity potential to 100 = maximum	% of GNI	metric tons per capita
Original data		2013	2013	2012	2012	2014	2005-2012	2011-2014	2005-2012	2013	2013	2009-2012	2013	2014	2014	2011	2013	2012	2012	2008	2009-2013	2011
RUS	Russian Federation	71.0732	22609.7	70.5	11.732	14	99.7	76.1436	4.10175	-0.711859	0.313947	0.26	5.6	0.217632	13.0906	3.22776	30054.3	9.19852	49.4118	34.1283	11.2841	12.6473
KOR	Korea, Rep.	81.4598	32918	100	11.7686	17		96.585	5.04985	0.752163	0.100797		3.1	0.405959	12.5767	1.32246	1291.33	17.1581	63.7781	1.71777	0.010501	11.8408
PRK	Korea, Dem. Rep.	69.807		81.8						-1.63528			4.6	0.525251	9.55485	15.8789	2691.25	11.5816	44.9531	0.653038		2.98719
VNM	Vietnam	75.7565	4905.72	75	5.488	11.9	97.1	24.5832	6.55657	-0.514598	0.321735	12.45	2	1.13181	6.65805	35.5295	4006.29	28.228	45.4252	12.0528	5.56077	1.97189
LAO	Lao PDR	68.2494	4401.74	64.6	4.576	10.2	83.9	17.6978	3.312	-0.799985	0.533763	62.01	1.4	1.82049	3.81901	86.5279	28125.2		67.5676	5.01136	8.24748	0.184437
MMR	Myanmar	65.0997		77.4	3.95	8.6	96.1	13.378	0.77323	-1.32654	0.430207		3.4	0.859883	5.30274	84.5192	18832.5	78.6858	47.6876	10.0227		0.199423
NPL	Nepal	68.4039	2189.64	36.7	3.236	12.4	82.4	17.2253	4.71699	-0.82269	0.478744	55.95	2.7	1.15628	5.21521	86.9455	7130.15	86.8859	25.3645	2.14367	4.16526	0.159608
IND	India	66.4562	5180	36	4.43	11.7	81.1	24.6867	3.31959	-0.349629	0.563	59.2392	3.6	1.21152	5.35607	39.8541	1154.82	27.6368	23.1146	39.9347	3.11422	1.69867
PAK	Pakistan	66.5854	4679.86	47.6	4.73335	7.7	70.7	9.81827	2.37237	-1.12536	0.562815	50.67	5.1	1.62842	4.3961	45.1295	301.961	39.1066	2.07685	4.88359	2.97676	0.927832
AFG	Afghanistan	60.9314		29	3.21	9.3		3.74394		-1.58353	0.705302		8	2.3576	2.40806	10.8075	1543.29		2.06782	3.40715	1.21058	0.420932
TJK	Tajikistan	67.3746	2417.15	94.4	9.85	11.2	99.9	24.4681	3.93535	-1.19796	0.383036	27.36	10.7	2.42072	3.17034	60.2528	7731.64	57.5449	2.92941	0.695627	1.16712	0.356149
KGZ	Kyrgyz Republic	70.2024	2975.25	91.8	9.272	12.5	99.8	47.6353	5.81883	-0.793604	0.34847	21.06	8	1.98383	4.12863	25.9507	8554.79	39.3808	5.14911	1.09313	7.44343	1.19959
KAZ	Kazakhstan	70.45	20305.2	97.5	10.368	15	99.8	55.2984	3.06072	-0.681872	0.323497	0.8	5.2	1.47907	6.70947	1.3819	3777.46	0.968619	1.22154	5.13912	16.0313	15.8101
JPN	Japan	83.332	36905.5	100	11.49	15.3		61.4593	3.78135	1.30569	0.138294		4	-0.16255	25.7889	4.6261	3376.82	5.21147	68.5665	35.9597	0.015954	9.29183
PHL	Philippines	68.7145	7597.91	74.3	8.88	11.3	97.8	33.842	2.65295	-0.318637	0.405869	41.72	7.1	1.71592	3.9771	29.4106	4868.2	40.332	26.0744	32.3254	1.99397	0.862803
MYS	Malaysia	75.0163	21812	95.7	9.533	12.7	98.4	37.2002	5.13138	0.38844	0.210355	2.27	3.2	1.57229	5.55002	6.54437	19517.5	5.4793	61.7331	13.8558	6.91713	7.84774
BRN	Brunei Darussalam	78.5664			8.68	14.5	99.7	25.3618	3.27204	0.646307			3.8	1.28921	4.56233	0.01583	20345.4	0.00448826	71.4231	0.127768	29.0444	23.9678
IDN	Indonesia	70.8174	9446.35	58.8	7.51075	12.7	98.8	31.5123	2.76544	-0.351565	0.499651	43.33	6.3	1.17238	5.31668	38.4508	8080.34	33.5768	51.3709	80.9625	3.86438	2.31329
MNG	Mongolia	67.5482	10223	56.2	8.31	15	95.7	62.2688	5.47617	-0.181105	0.319549		4.9	1.48039	3.81372	3.54398	12257.5	4.06847	6.90929	4.15957	15.5156	6.92736
CHN	China	75.353	11747.2	65.3	7.54	12.9	99.6	29.6964		-0.544884	0.201794	18.61	4.6	0.506311	9.12832	18.0165	2072.37	11.7376	22.6228	66.6099	3.30198	6.7103
BTN	Bhutan	68.3023	6704.57	46.9	2.304	12.4	74.4	10.9105	4.65382	0.15749	0.495437	15.15	2.1	1.52751	4.8885	89.9623	103456		85.8042	1.12152	16.6276	0.769164
Normalized to 0-	1	using	1	*(country value - min)/(max-min)
RUS	Russian Federation	0.452746	0.588204	0.584507	0.996131	0.677419	0.993151	0.779823	0.575536	0.313986	0.647397	1	0.548387	0.147171	0.543108	0.0357093	0.288428	0.105823	0.569741	0.420618	0.61171	0.475488
KOR	Korea, Rep.	0.916422	0.885138	1	1	1		1	0.739472	0.811788	1		0.817204	0.220073	0.565088	0.0145267	0.00959119	0.197437	0.739591	0.0196698	1	0.509365
PRK	Korea, Dem. Rep.	0.39622		0.743662						0			0.655914	0.266252	0.694332	0.176361	0.0231625	0.133252	0.517027	0.00649807		0.881235
VNM	Vietnam	0.661818	0.0782375	0.647887	0.336411	0.451613	0.90411	0.224462	1	0.381059	0.634514	0.802591	0.935484	0.501054	0.818228	0.394831	0.0359108	0.324851	0.522609	0.147524	0.808835	0.92388
LAO	Lao PDR	0.326689	0.0637201	0.501408	0.240052	0.268817	0.452055	0.150298	0.43898	0.284021	0.283768	0	1	0.767648	0.939654	0.961817	0.269726		0.784393	0.0604145	0.716298	0.998957
MMR	Myanmar	0.186079		0.68169	0.173911	0.0967742	0.869863	0.10377	0	0.104978	0.455075		0.784946	0.39579	0.876195	0.939484	0.17964	0.905617	0.549356	0.12241		0.998328
NPL	Nepal	0.333583	0	0.108451	0.098472	0.505376	0.400685	0.145209	0.681917	0.276301	0.374783	0.0981377	0.860215	0.510529	0.879938	0.96646	0.0661944	1	0.285436	0.0249385	0.8569	1
IND	India	0.246638	0.086138	0.0985915	0.224626	0.430108	0.356164	0.225576	0.440292	0.437153	0.235403	0.044872	0.763441	0.531913	0.873914	0.442911	0.00826789	0.318046	0.258836	0.492448	0.8931	0.935356
PAK	Pakistan	0.252402	0.0717315	0.261972	0.256677	0	0	0.0654272	0.276508	0.173386	0.235708	0.183644	0.602151	0.693297	0.914972	0.501562	0	0.450063	0.010112	0.0588339	0.897835	0.967733
AFG	Afghanistan	0		0	0.0957249	0.172043		0		0.0175988	0		0.290322	0.975566	1	0.119979	0.0120338		0.0100054	0.040569	0.958666	0.989024
TJK	Tajikistan	0.287636	0.00655361	0.921127	0.797285	0.376344	1	0.223222	0.546764	0.1487	0.533107	0.561134	0	1	0.967398	0.669698	0.0720254	0.662287	0.0201917	0.00702494	0.960163	0.991745
KGZ	Kyrgyz Republic	0.413875	0.0226298	0.884507	0.736215	0.516129	0.996575	0.472758	0.872437	0.28619	0.590288	0.663158	0.290322	0.830876	0.926412	0.288337	0.0800053	0.453218	0.0464347	0.0119424	0.743992	0.956318
KAZ	Kazakhstan	0.424927	0.521823	0.964789	0.852015	0.784946	0.996575	0.555298	0.395531	0.324182	0.6316	0.991255	0.591398	0.635481	0.816029	0.0151876	0.0336924	0.0110971	0	0.0619951	0.448205	0.342644
JPN	Japan	1	1	1	0.970562	0.817204		0.621658	0.520135	1	0.937971		0.72043	0	0	0.0512558	0.0298086	0.059932	0.796202	0.443274	0.999812	0.616426
PHL	Philippines	0.34745	0.155787	0.638028	0.694798	0.387097	0.928082	0.32419	0.325023	0.44769	0.495337	0.328583	0.387097	0.727167	0.932892	0.326802	0.0442664	0.464168	0.293829	0.398314	0.931685	0.970464
MYS	Malaysia	0.628773	0.565227	0.939437	0.763792	0.537634	0.94863	0.360361	0.75357	0.688113	0.818764	0.967449	0.806452	0.67157	0.865619	0.0725825	0.186281	0.0630148	0.715413	0.169828	0.762118	0.677081
BRN	Brunei Darussalam	0.787259			0.673667	0.731183	0.993151	0.232848	0.43207	0.775794			0.741935	0.561987	0.907862	0	0.194307	0	0.829976	0	0	0
IDN	Indonesia	0.44133	0.209031	0.419718	0.550127	0.537634	0.962329	0.299095	0.344474	0.436494	0.340197	0.30251	0.473118	0.51676	0.875599	0.427309	0.0754058	0.386416	0.592903	1	0.867263	0.90954
MNG	Mongolia	0.295385	0.231402	0.383099	0.634574	0.784946	0.856164	0.630377	0.813188	0.494455	0.63813		0.623656	0.635993	0.93988	0.039225	0.115901	0.0467762	0.0672448	0.0498771	0.465965	0.715739
CHN	China	0.643806	0.275308	0.511268	0.553218	0.55914	0.989726	0.279537		0.370761	0.832926	0.702834	0.655914	0.25892	0.712575	0.200126	0.0171629	0.135048	0.253021	0.822445	0.886633	0.724856
BTN	Bhutan	0.32905	0.130054	0.252113	0	0.505376	0.126712	0.0771913	0.670995	0.609585	0.347168	0.758866	0.924731	0.654232	0.893912	1	1		1	0.0122936	0.427665	0.974397
Scores & ranks of dimensions		Healthy and Decent Life		Education		Well-balanced Society		Renewable Resources		Natural Resources and Biodiversity		Carbon Reducation
		score	rank	score	rank	score	rank	score	rank	score	rank	score	rank
RUS	Russian Federation	0.541819	7	0.804412	2	0.533342	13	0.14332	12	0.534023	8	0.475488	19
KOR	Korea, Rep.	0.933853	2	0.934868	1	0.682831	4	0.0738517	16	0.58642	4	0.509365	18
PRK	Korea, Dem. Rep.	0.569941	6			0.404125	21	0.110925	14	0.261763	19	0.881235	13
VNM	Vietnam	0.462648	9	0.583319	11	0.678822	5	0.251864	11	0.492989	10	0.92388	11
LAO	Lao PDR	0.297272	16	0.31004	16	0.545849	11	0.615772	4	0.520368	9	0.998957	2
MMR	Myanmar	0.433885	11	0.248864	18	0.523397	15	0.674914	3	0.335883	14	0.998328	3
NPL	Nepal	0.147345	19	0.366332	14	0.499984	16	0.677551	2	0.389091	12	1	1
IND	India	0.143789	20	0.335353	15	0.481116	18	0.256408	10	0.548128	6	0.935356	10
PAK	Pakistan	0.195369	18	0.119723	19	0.467193	19	0.317208	6	0.32226	16	0.967733	8
AFG	Afghanistan	0	21	0.089256	20	0.456697	20	0.0660064	18	0.336414	13	0.989024	5
TJK	Tajikistan	0.405105	12	0.588723	10	0.535056	12	0.468003	5	0.329127	15	0.991745	4
KGZ	Kyrgyz Republic	0.440337	10	0.718823	5	0.597874	8	0.273854	9	0.267456	18	0.956318	9
KAZ	Kazakhstan	0.637179	5	0.716873	6	0.664991	7	0.0199924	21	0.170067	21	0.342644	20
JPN	Japan	1	1	0.73239	4	0.53168	14	0.0469988	20	0.746429	2	0.616426	17
PHL	Philippines	0.380422	13	0.531838	13	0.553128	10	0.278412	8	0.541276	7	0.970464	7
MYS	Malaysia	0.711145	4	0.672797	7	0.802994	1	0.107293	15	0.54912	5	0.677081	16
BRN	Brunei Darussalam	0.787259	3	0.612584	8	0.746895	2	0.0647691	19	0.276659	17	0	21
IDN	Indonesia	0.356693	14	0.538732	12	0.49078	17	0.296377	7	0.820055	1	0.90954	12
MNG	Mongolia	0.303295	15	0.74385	3	0.666423	6	0.0673006	17	0.194362	20	0.715739	15
CHN	China	0.476794	8	0.595405	9	0.588988	9	0.117446	13	0.654033	3	0.724856	14
BTN	Bhutan	0.237072	17	0.276055	17	0.698082	3	1	1	0.479986	11	0.974397	6
Scores and ranks of adjusted index and SNP		Social-Adjusted SNP Index		Environmental-Adjusted SNP Index		SNP-Adjusted Index		SNP
		score	rank	score	rank	score	rank	score	rank
RUS	Russian Federation	0.626524	6	0.384277	18	0.490672	13	22.3513	3
KOR	Korea, Rep.	0.850517	1	0.389879	17	0.575846	2	13.3523	4
PRK	Korea, Dem. Rep.	0.487033	13	0.417974	16	0.451184	15	2.29493	8
VNM	Vietnam	0.574929	8	0.556244	9	0.56551	5	2.21933	9
LAO	Lao PDR	0.384387	17	0.711699	2	0.523037	11	0.212145	18
MMR	Myanmar	0.402048	16	0.669708	5	0.518898	12	1.11947	13
NPL	Nepal	0.337887	18	0.688881	3	0.482456	14	0.411891	15
IND	India	0.320086	19	0.579964	8	0.430858	17	12.9332	5
PAK	Pakistan	0.260761	20	0.535734	10	0.373763	18	1.90355	10
AFG	Afghanistan	0.181984	21	0.463815	14	0.290529	20	0.372006	16
TJK	Tajikistan	0.509628	11	0.596292	7	0.551259	7	0.191448	19
KGZ	Kyrgyz Republic	0.585678	7	0.499209	11	0.540718	8	0.370171	17
KAZ	Kazakhstan	0.673014	5	0.177568	20	0.345696	19	1.42199	12
JPN	Japan	0.75469	2	0.469951	13	0.59554	1	23.7407	2
PHL	Philippines	0.488462	12	0.596717	6	0.539883	9	1.5227	11
MYS	Malaysia	0.728979	3	0.444498	15	0.569236	4	4.05673	7
BRN	Brunei Darussalam	0.715579	4	0.113809	21	0.285376	21	0.143086	20
IDN	Indonesia	0.462068	14	0.675324	4	0.558611	6	4.75817	6
MNG	Mongolia	0.571189	9	0.325801	19	0.431386	16	0.639783	14
CHN	China	0.553729	10	0.498778	12	0.525536	10	42.5817	1
BTN	Bhutan	0.403736	15	0.818128	1	0.574724	3	0.0748048	21
